# Supplementary material for: Dysregulated Collagen Homeostasis by Matrix Stiffening and TGF-β1 in Fibroblasts from Idiopathic Pulmonary Fibrosis Patients: Role of FAK/Akt
Source: MDPI journal article supplement (doi:10.3390/ijms18112431), 2017-11-16
Supplement: s1 [file s1]

# SUPPLEMENTARY FIGURE S1: potential synergy between matrix stiffness and TGF- $\beta$ 1

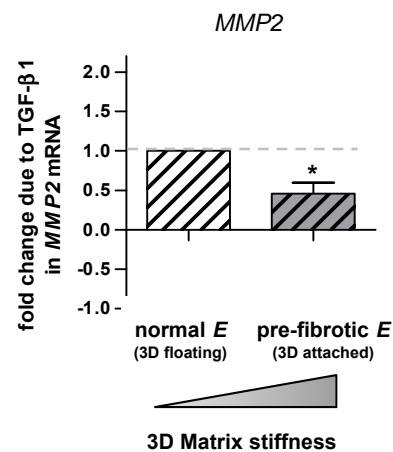

Supplementary Figure S1. Difference in *MMP2* expression with or without TGF- $\beta$ 1 measured in soft and stiff substrata (shown in Figure 2) normalized to that obtained in soft substrata using 3D collagen-I gels in pulmonary fibroblasts derived from healthy donors (n=3). Further details are given in the main text. \*  $P \leq 0.05$ , with respect to no change (1) was determined by Student's t-test.

## SUPPLEMENTARY FIGURE S2: Time-course of Akt activation by TGF- $\beta$ 1

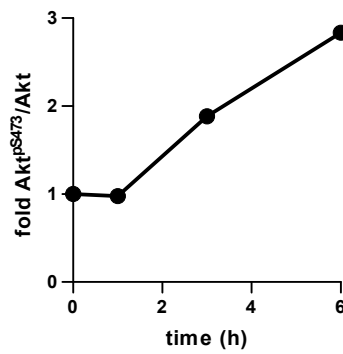

Supplementary Figure S2. Quantification of the Western-blot shown in Fig. 5A corresponding to the activity of Akt induced by TGF- $\beta$ 1 as a function of time in control fibroblasts cultured in 2D.
